# Supplementary material for: Effect of an integrated neonatal care kit on neonatal health outcomes: a cluster randomised controlled trial in rural Pakistan
Source: PubMed Central journal article supplement — BMJ Glob Health. 2019 May 16;4(3):e001393. doi: 10.1136/bmjgh-2019-001393 (PMC6528753; doi:10.1136/bmjgh-2019-001393), 2019-05-16
Supplement: bmjgh-2019-001393supp002.pdf [file bmjgh-2019-001393supp002.pdf]

**Panel 1: Description of the intervention and standard care delivered by Lady Health Workers**

|                                                                                                                                                                                  | Intervention Clusters | Control Clusters |
|----------------------------------------------------------------------------------------------------------------------------------------------------------------------------------|-----------------------|------------------|
| Deliver basic reproductive maternal, newborn, child health education messaging (i.e., family planning, nutrition awareness education)                                            | Yes                   | Yes              |
| Promote healthy behaviour (i.e., encourage appropriate breastfeeding and complementary feeding behaviour, discuss fundamentals of safe water, sanitations, and hygiene practice) | Yes                   | Yes              |
| Basic curative care (i.e., oral rehydration salts for children with diarrhea)                                                                                                    | Yes                   | Yes              |
| Identify neonatal danger signs and make referrals                                                                                                                                | Yes                   | Yes              |
| Equipped with a hand-held, battery operated scale to weigh newborns                                                                                                              | Yes                   | No               |
| Provision of clean delivery kit to pregnant women                                                                                                                                | Yes                   | No               |
| Provision of chlorhexidine to pregnant women alongside education on how it should be applied to newborn's umbilicus                                                              | Yes                   | No               |
| Provision of sunflower oil emollient to pregnant women alongside education on newborn massage                                                                                    | Yes                   | No               |
| Improved thermal care (i.e., detection of hyper- and hypothermia, reflective blanket and heat pack for warming)                                                                  | Yes                   | No               |
